# Supplementary material
Source: PubMed Central journal article supplement (PMC7891839)

**A** Human germline mutation rates (per kb) of different mutation types

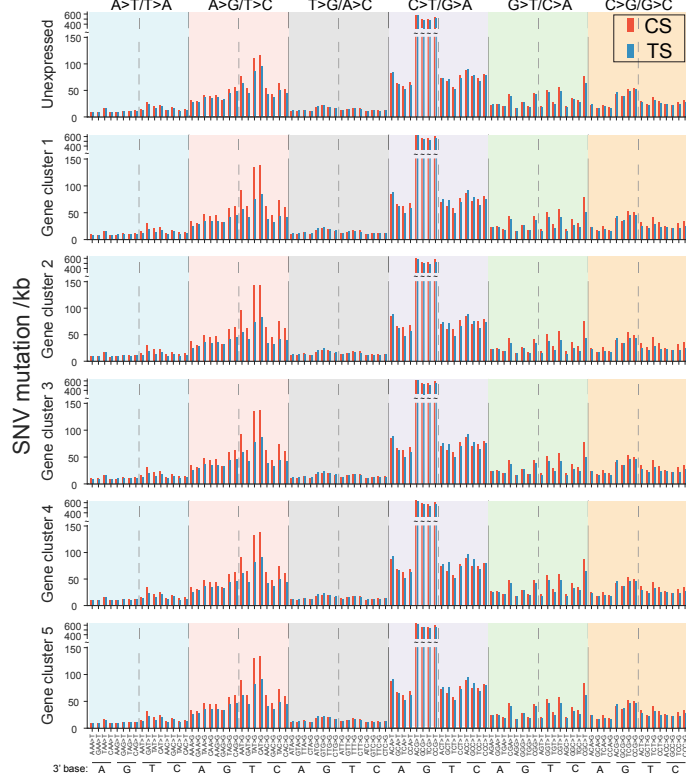

**B** Human asymmetry scores of different mutation types

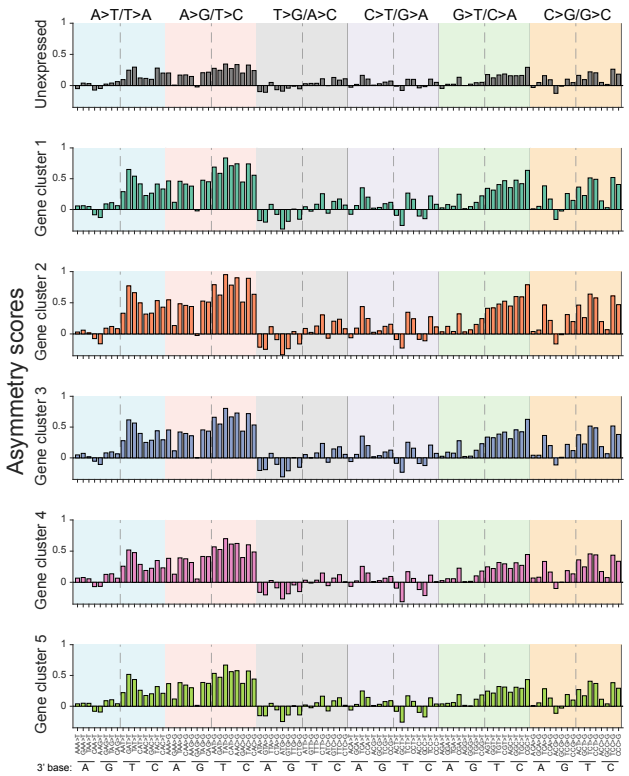

**C** Mouse germline mutation rates (per kb) of different mutation types

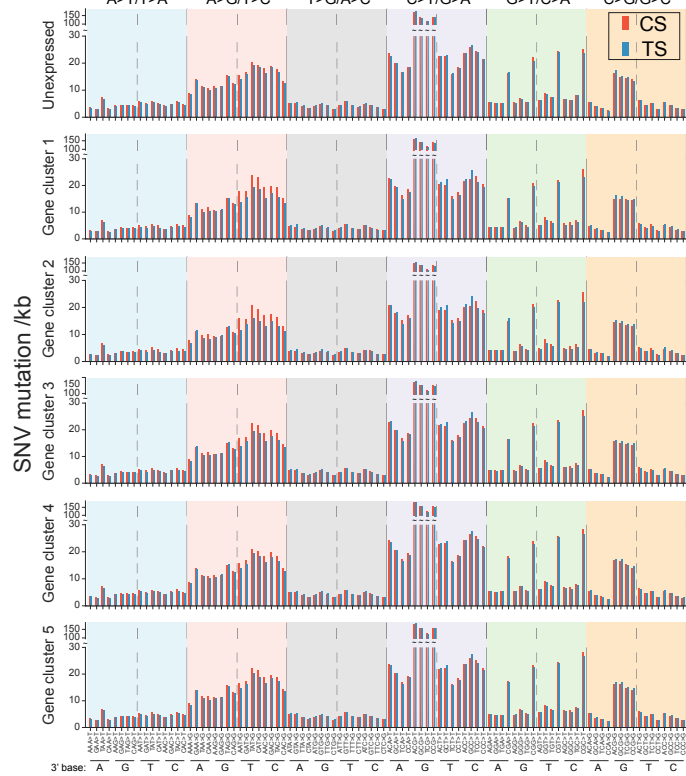

**D** Mouse asymmetry scores of different mutation types

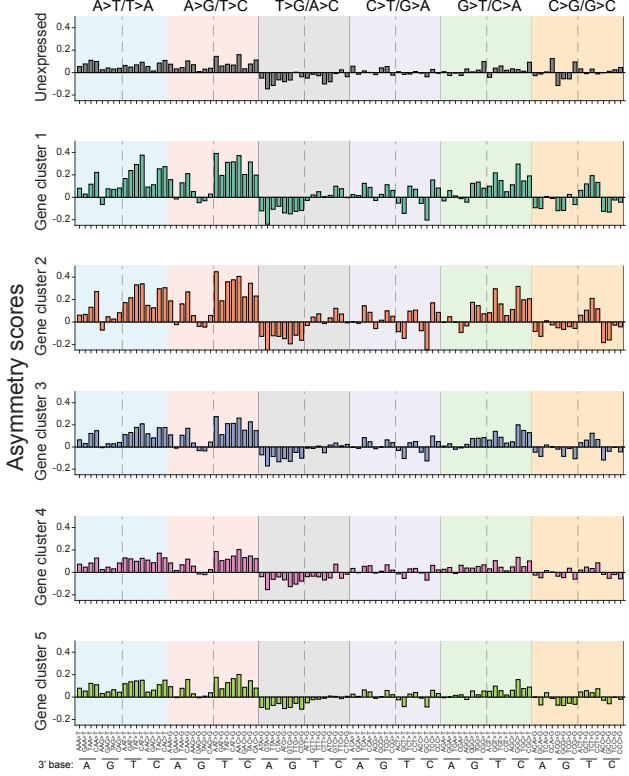

Supplement: NIHMS1578380-supplement-6.pdf [file NIHMS1578380-supplement-6.pdf]
