# Supplementary material
Source: PubMed Central journal article supplement (PMC7891839)
Supplement: NIHMS1578380-supplement-Tables_S1-S2.pdf [file NIHMS1578380-supplement-Tables_S1-S2.pdf]

**Table S1. General sample information across scRNA-seq replicates, Related to Figure 1.**

| Sample      | Age | Raw reads | Clean reads (1) | Cell # (after filtering) | UMI number distribution of single cells |      |      |        |       |       | Mito% (2) | Ribo% (3) | Correlation coefficient (4) |
|-------------|-----|-----------|-----------------|--------------------------|-----------------------------------------|------|------|--------|-------|-------|-----------|-----------|-----------------------------|
|             |     |           |                 |                          | Mean                                    | 5%   | 25%  | Median | 75%   | 95%   |           |           |                             |
| Human-D1-T1 | 40y | 124.9M    | 57.8M           | 808                      | 7218                                    | 1771 | 2983 | 5114   | 10341 | 18365 | 5.39%     | 3.91%     | 0.9967                      |
| Human-D1-T2 |     | 72.1M     | 34.2M           | 777                      | 6184                                    | 1721 | 2795 | 4614   | 8396  | 15099 | 6.06%     | 3.66%     |                             |
| Human-D2-T1 | 45y | 81.3M     | 37.4M           | 420                      | 6305                                    | 1908 | 2863 | 4914   | 9041  | 14037 | 0.33%     | 2.55%     | 0.9982                      |
| Human-D2-T2 |     | 107.0M    | 43.8M           | 549                      | 6036                                    | 2063 | 3072 | 5234   | 8200  | 13290 | 0.30%     | 2.53%     |                             |
| Mouse-D1    | 4m  | 70.1M     | 37.3M           | 591                      | 8472                                    | 1663 | 3717 | 7259   | 11975 | 19647 | 1.48%     | 1.83%     | 0.9655                      |
| Mouse-D2    | 4m  | 179.5M    | 78.0M           | 1002                     | 9308                                    | 1669 | 3436 | 7466   | 13484 | 23744 | 1.00%     | 2.28%     |                             |

**Note: (1):** The clean reads were determined by having valid barcode, UMI and linker (W1 sequence) sequences, and the mRNA region of the read was uniquely mapped to the reference genome.

**(2):** Mito% stands for the ratio of total UMI count of mitochondria genes versus total UMI counts of all genes.

**(3):** Ribo% stands for the ratio of total UMI count of ribosomal protein genes versus total UMI counts of all genes.

**(4):** Pearson correlation coefficient between the average gene expression profiles of biological/technical replicates.

**Table S2. Detected gene numbers across scRNA-seq studies of human developmental systems, Related to Figure 1.**

| scRNA-seq sample / Publication                                                         | Accession Number                                                                            | scRNA-seq method                                         | Cell cluster name (1) | Cell number | Gene number distribution of single cells (2) |      |      |        |      |      | Gene number per cluster by bootstrap 1000 cells (3) | Gene number per sample by bootstrap 1000 cells (4) |
|----------------------------------------------------------------------------------------|---------------------------------------------------------------------------------------------|----------------------------------------------------------|-----------------------|-------------|----------------------------------------------|------|------|--------|------|------|-----------------------------------------------------|----------------------------------------------------|
|                                                                                        |                                                                                             |                                                          |                       |             | Mean                                         | 5%   | 25%  | Median | 75%  | 95%  |                                                     |                                                    |
| Human adult testicular cells / Guo et al, Cell Research, 2018                          | GSE112013                                                                                   | 10X Genomics scRNA-seq                                   | SSCs                  | 294         | 4528                                         | 2524 | 3572 | 4447   | 5254 | 6539 | 16186                                               | 15783                                              |
|                                                                                        |                                                                                             |                                                          | Diff. Sg              | 320         | 3971                                         | 2129 | 3005 | 4023   | 4817 | 6162 | 14697                                               |                                                    |
|                                                                                        |                                                                                             |                                                          | Early Sc              | 560         | 3324                                         | 2259 | 2794 | 3149   | 3584 | 5191 | 14420                                               |                                                    |
|                                                                                        |                                                                                             |                                                          | Late Sc               | 319         | 4041                                         | 1892 | 2866 | 3854   | 5298 | 6330 | 14391                                               |                                                    |
|                                                                                        |                                                                                             |                                                          | RS                    | 509         | 4074                                         | 1915 | 2964 | 4067   | 5101 | 6371 | 14746                                               |                                                    |
|                                                                                        |                                                                                             |                                                          | ES                    | 876         | 3470                                         | 1569 | 2355 | 3334   | 4364 | 6002 | 14904                                               |                                                    |
|                                                                                        |                                                                                             |                                                          | Sperm-1               | 920         | 1843                                         | 1035 | 1358 | 1733   | 2248 | 2998 | 12535                                               |                                                    |
|                                                                                        |                                                                                             |                                                          | Sperm-2               | 1025        | 1320                                         | 858  | 1034 | 1211   | 1481 | 2122 | 11576                                               |                                                    |
|                                                                                        |                                                                                             |                                                          | PMC                   | 338         | 2422                                         | 1350 | 1970 | 2385   | 2909 | 3540 | 13506                                               |                                                    |
|                                                                                        |                                                                                             |                                                          | Macrophage            | 341         | 1815                                         | 1204 | 1543 | 1797   | 2039 | 2414 | 12442                                               |                                                    |
|                                                                                        |                                                                                             |                                                          | Endothelia            | 353         | 2495                                         | 1450 | 1843 | 2229   | 2802 | 4646 | 13322                                               |                                                    |
|                                                                                        |                                                                                             |                                                          | Sertoli               | 28          | 2465                                         | 1282 | 1947 | 2252   | 3194 | 3656 | 11522                                               |                                                    |
|                                                                                        |                                                                                             |                                                          | Leydig                | 607         | 1747                                         | 1270 | 1473 | 1685   | 1955 | 2464 | 12809                                               |                                                    |
| Human adult bone marrow hematopoietic cells / Pellin et al, Nature Communication, 2019 | GSE117498                                                                                   | InDrop                                                   | HSC                   | 1282        | 883                                          | 533  | 743  | 854    | 988  | 1304 | 11206                                               | 11703                                              |
|                                                                                        |                                                                                             |                                                          | MPP                   | 215         | 980                                          | 646  | 841  | 965    | 1080 | 1330 | 12322                                               |                                                    |
|                                                                                        |                                                                                             |                                                          | MLP                   | 123         | 1377                                         | 929  | 1122 | 1250   | 1435 | 2357 | 14348                                               |                                                    |
|                                                                                        |                                                                                             |                                                          | PreB/NK               | 592         | 987                                          | 491  | 760  | 919    | 1166 | 1678 | 12238                                               |                                                    |
|                                                                                        |                                                                                             |                                                          | MEP                   | 1211        | 922                                          | 593  | 701  | 825    | 1048 | 1632 | 11096                                               |                                                    |
|                                                                                        |                                                                                             |                                                          | CMP                   | 1576        | 1068                                         | 478  | 834  | 996    | 1255 | 1808 | 11433                                               |                                                    |
|                                                                                        |                                                                                             |                                                          | GMP                   | 1012        | 1432                                         | 650  | 974  | 1326   | 1814 | 2553 | 12176                                               |                                                    |
|                                                                                        |                                                                                             |                                                          | CD34+CD164+           | 6343        | 1057                                         | 510  | 723  | 966    | 1305 | 1891 | 11195                                               |                                                    |
|                                                                                        |                                                                                             |                                                          | CD34-CD164high        | 4434        | 941                                          | 243  | 434  | 790    | 1284 | 2146 | 10505                                               |                                                    |
|                                                                                        |                                                                                             |                                                          | CD34lowCD164high      | 4266        | 1683                                         | 693  | 1270 | 1712   | 2079 | 2663 | 11679                                               |                                                    |
| CD34NegCD164low                                                                        | 358                                                                                         | 655                                                      | 128                   | 360         | 539                                          | 801  | 1568 | 10347  |      |      |                                                     |                                                    |
| Human embryonic midbrain / Le Manno et al, Cell, 2016                                  | GSE76381                                                                                    | Fluidigm C1 System and protocols from Islam et al., 2014 | hDA0                  | 47          | 1665                                         | 908  | 1211 | 1493   | 2036 | 2853 | 11333                                               | 14173                                              |
|                                                                                        |                                                                                             |                                                          | hDA1                  | 38          | 2348                                         | 1056 | 1666 | 2006   | 2829 | 4438 | 11566                                               |                                                    |
|                                                                                        |                                                                                             |                                                          | hDA2                  | 37          | 1887                                         | 1027 | 1370 | 1689   | 2213 | 3573 | 10816                                               |                                                    |
|                                                                                        |                                                                                             |                                                          | hEndo                 | 77          | 2428                                         | 1273 | 1866 | 2276   | 2841 | 3923 | 12917                                               |                                                    |
|                                                                                        |                                                                                             |                                                          | hGaba                 | 59          | 1952                                         | 1098 | 1572 | 1809   | 2334 | 3012 | 12551                                               |                                                    |
|                                                                                        |                                                                                             |                                                          | hMgl                  | 19          | 2025                                         | 1113 | 1460 | 1828   | 2334 | 3323 | 10092                                               |                                                    |
|                                                                                        |                                                                                             |                                                          | hNProg                | 100         | 1714                                         | 945  | 1257 | 1661   | 2099 | 2824 | 12433                                               |                                                    |
|                                                                                        |                                                                                             |                                                          | hNbGaba               | 22          | 2100                                         | 928  | 1399 | 1950   | 2440 | 4683 | 10626                                               |                                                    |
|                                                                                        |                                                                                             |                                                          | hNbM                  | 91          | 1922                                         | 975  | 1218 | 1806   | 2376 | 3328 | 12392                                               |                                                    |
|                                                                                        |                                                                                             |                                                          | hNbML1                | 52          | 2133                                         | 1018 | 1457 | 2110   | 2629 | 3466 | 11651                                               |                                                    |
|                                                                                        |                                                                                             |                                                          | hNbML5                | 47          | 1864                                         | 972  | 1236 | 1790   | 2272 | 3352 | 11428                                               |                                                    |
|                                                                                        |                                                                                             |                                                          | hOMTN                 | 106         | 2515                                         | 1339 | 1928 | 2494   | 3091 | 3712 | 13133                                               |                                                    |
|                                                                                        |                                                                                             |                                                          | hOPC                  | 29          | 2221                                         | 1215 | 1668 | 2277   | 2759 | 3028 | 11184                                               |                                                    |
|                                                                                        |                                                                                             |                                                          | hPeric                | 191         | 2211                                         | 1097 | 1671 | 2188   | 2685 | 3502 | 13773                                               |                                                    |
|                                                                                        |                                                                                             |                                                          | hProgBP               | 120         | 2035                                         | 1115 | 1540 | 1919   | 2426 | 3328 | 12658                                               |                                                    |
|                                                                                        |                                                                                             |                                                          | hProgFPL              | 54          | 2685                                         | 1544 | 2200 | 2694   | 3212 | 3752 | 11984                                               |                                                    |
|                                                                                        |                                                                                             |                                                          | hProgFPM              | 82          | 2025                                         | 1255 | 1621 | 1960   | 2361 | 3038 | 12163                                               |                                                    |
|                                                                                        |                                                                                             |                                                          | hProgM                | 67          | 2259                                         | 1083 | 1639 | 2256   | 2903 | 3531 | 12329                                               |                                                    |
|                                                                                        |                                                                                             |                                                          | hRN                   | 40          | 1833                                         | 850  | 1306 | 1703   | 2183 | 3235 | 10760                                               |                                                    |
|                                                                                        |                                                                                             |                                                          | hRgl1                 | 39          | 2375                                         | 1358 | 1844 | 2189   | 2955 | 3518 | 11771                                               |                                                    |
|                                                                                        |                                                                                             |                                                          | hRgl2a                | 210         | 2550                                         | 1375 | 1990 | 2549   | 3086 | 3791 | 13750                                               |                                                    |
|                                                                                        |                                                                                             |                                                          | hRgl2b                | 77          | 1983                                         | 1259 | 1544 | 1880   | 2416 | 2931 | 12753                                               |                                                    |
|                                                                                        |                                                                                             |                                                          | hRgl2c                | 26          | 2326                                         | 1226 | 1686 | 2350   | 2847 | 3614 | 11028                                               |                                                    |
| hRgl3                                                                                  | 51                                                                                          | 2616                                                     | 1301                  | 2124        | 2559                                         | 3142 | 4067 | 12463  |      |      |                                                     |                                                    |
| hSert                                                                                  | 14                                                                                          | 2762                                                     | 1315                  | 1850        | 2457                                         | 3330 | 4793 | 9943   |      |      |                                                     |                                                    |
| Human developing cortex / Nowakowski et al, Science, 2017                              | <a href="https://cells.ucsc.edu/?ds=cortex-dev#">https://cells.ucsc.edu/?ds=cortex-dev#</a> | Fluidigm C1 Auto-prep System                             | Astrocyte             | 46          | 2568                                         | 1262 | 2012 | 2449   | 3260 | 4162 | 12499                                               | 14652                                              |
|                                                                                        |                                                                                             |                                                          | Choroid               | 14          | 2514                                         | 1482 | 2049 | 2498   | 3005 | 3665 | 9211                                                |                                                    |
|                                                                                        |                                                                                             |                                                          | EN-PFC                | 242         | 2306                                         | 1193 | 1621 | 2220   | 2830 | 3771 | 13967                                               |                                                    |
|                                                                                        |                                                                                             |                                                          | EN-V                  | 424         | 2360                                         | 1214 | 1808 | 2311   | 2837 | 3601 | 14567                                               |                                                    |
|                                                                                        |                                                                                             |                                                          | Endothelial           | 30          | 2477                                         | 1375 | 1730 | 2483   | 3028 | 3775 | 11533                                               |                                                    |
|                                                                                        |                                                                                             |                                                          | Glyc                  | 77          | 2395                                         | 1016 | 1498 | 2155   | 3207 | 4403 | 13569                                               |                                                    |
|                                                                                        |                                                                                             |                                                          | IN-CTX-CGE            | 301         | 2198                                         | 1049 | 1581 | 2142   | 2736 | 3470 | 14321                                               |                                                    |
|                                                                                        |                                                                                             |                                                          | IN-CTX-MGE            | 287         | 2196                                         | 1120 | 1606 | 1995   | 2615 | 3808 | 14083                                               |                                                    |
|                                                                                        |                                                                                             |                                                          | IN-STR                | 83          | 2307                                         | 1212 | 1735 | 2175   | 3002 | 3596 | 12948                                               |                                                    |
|                                                                                        |                                                                                             |                                                          | IPC-div               | 87          | 2426                                         | 1226 | 1792 | 2304   | 2891 | 3930 | 13212                                               |                                                    |
|                                                                                        |                                                                                             |                                                          | IPC-nEN               | 183         | 2244                                         | 1237 | 1641 | 2177   | 2738 | 3692 | 13691                                               |                                                    |
|                                                                                        |                                                                                             |                                                          | MGE-IPC               | 146         | 2526                                         | 1195 | 1661 | 2319   | 3165 | 4292 | 15867                                               |                                                    |
|                                                                                        |                                                                                             |                                                          | MGE-RG                | 114         | 2270                                         | 1065 | 1627 | 2183   | 2877 | 3866 | 14134                                               |                                                    |
|                                                                                        |                                                                                             |                                                          | MGE-div               | 57          | 2259                                         | 1229 | 1520 | 2040   | 2797 | 4057 | 12809                                               |                                                    |
|                                                                                        |                                                                                             |                                                          | Microglia             | 77          | 2110                                         | 1081 | 1540 | 1856   | 2501 | 4066 | 13200                                               |                                                    |
|                                                                                        |                                                                                             |                                                          | Mural                 | 19          | 2057                                         | 961  | 1495 | 2099   | 2724 | 2900 | 9538                                                |                                                    |

|                                                                     |           |                        |           |      |      |      |      |       |      |      |       |       |
|---------------------------------------------------------------------|-----------|------------------------|-----------|------|------|------|------|-------|------|------|-------|-------|
|                                                                     |           |                        | OPC       | 37   | 2440 | 1332 | 1719 | 2119  | 2913 | 4432 | 11730 |       |
|                                                                     |           |                        | RG-div    | 257  | 2380 | 1115 | 1694 | 2208  | 2926 | 3946 | 14161 |       |
|                                                                     |           |                        | RG-early  | 53   | 2603 | 1128 | 1958 | 2655  | 3045 | 4201 | 12343 |       |
|                                                                     |           |                        | U         | 191  | 3609 | 1823 | 2652 | 3618  | 4516 | 5498 | 14691 |       |
|                                                                     |           |                        | nEN-early | 507  | 2404 | 1221 | 1804 | 2330  | 2891 | 3772 | 14792 |       |
|                                                                     |           |                        | nEN-late  | 321  | 2207 | 1121 | 1683 | 2055  | 2639 | 3795 | 14522 |       |
|                                                                     |           |                        | nIN       | 314  | 2125 | 1089 | 1482 | 1906  | 2647 | 3638 | 13820 |       |
|                                                                     |           |                        | oRG       | 65   | 2372 | 1002 | 1556 | 2200  | 2847 | 4332 | 12822 |       |
|                                                                     |           |                        | iRG       | 100  | 2304 | 1257 | 1745 | 2274  | 2685 | 3739 | 13177 |       |
|                                                                     |           |                        | vRG       | 97   | 2113 | 1207 | 1556 | 1891  | 2472 | 3737 | 14057 |       |
| Human embryonic kidney, week 16 / Hochane et al, PLoS Biology, 2019 | GSM314360 | 10X Genomics scRNA-seq | CnT       | 80   | 2175 | 1237 | 1684 | 2015  | 2510 | 3713 | 12354 | 13356 |
|                                                                     |           |                        | DTLH      | 67   | 2425 | 1182 | 1656 | 2010  | 2830 | 4970 | 12566 |       |
|                                                                     |           |                        | End       | 223  | 1736 | 953  | 1186 | 1524  | 2186 | 3224 | 12291 |       |
|                                                                     |           |                        | ErPrT     | 338  | 1926 | 1130 | 1552 | 1854  | 2182 | 3065 | 12608 |       |
|                                                                     |           |                        | ICa       | 653  | 1476 | 943  | 1110 | 1317  | 1643 | 2630 | 12213 |       |
|                                                                     |           |                        | ICb       | 677  | 1237 | 944  | 1057 | 1172  | 1344 | 1747 | 11411 |       |
|                                                                     |           |                        | IPC       | 177  | 1836 | 1070 | 1429 | 1771  | 2140 | 2965 | 12439 |       |
|                                                                     |           |                        | Leu       | 65   | 1457 | 791  | 1005 | 1300  | 1740 | 2812 | 10443 |       |
|                                                                     |           |                        | Mes       | 37   | 1278 | 893  | 1118 | 1232  | 1419 | 1777 | 9170  |       |
|                                                                     |           |                        | NPCa      | 522  | 1251 | 974  | 1094 | 1207  | 1343 | 1674 | 11473 |       |
|                                                                     |           |                        | NPCb      | 296  | 1550 | 1027 | 1268 | 1456  | 1722 | 2452 | 12127 |       |
|                                                                     |           |                        | NPCc      | 596  | 1521 | 1034 | 1256 | 1467  | 1690 | 2225 | 12003 |       |
|                                                                     |           |                        | NPCd      | 280  | 2178 | 1358 | 1747 | 2104  | 2515 | 3277 | 12936 |       |
|                                                                     |           |                        | PTA       | 459  | 2424 | 1165 | 2018 | 2381  | 2860 | 3576 | 13109 |       |
|                                                                     |           |                        | Pod       | 430  | 1590 | 1136 | 1259 | 1414  | 1786 | 2722 | 11734 |       |
|                                                                     |           |                        | Prolif    | 85   | 1021 | 745  | 856  | 961   | 1107 | 1581 | 9074  |       |
|                                                                     |           |                        | RVCSBa    | 367  | 1915 | 1245 | 1559 | 1828  | 2142 | 3045 | 12693 |       |
|                                                                     |           |                        | RVCSBb    | 312  | 1688 | 1056 | 1314 | 1552  | 1898 | 2802 | 12431 |       |
|                                                                     |           |                        | SSBm/d    | 151  | 2374 | 1393 | 1607 | 1826  | 2755 | 4957 | 12987 |       |
|                                                                     |           |                        | SSBpod    | 257  | 1789 | 1238 | 1516 | 1741  | 1968 | 2486 | 11938 |       |
| SSBpr                                                               | 213       | 2415                   | 1425      | 1825 | 2171 | 2814 | 4365 | 13350 |      |      |       |       |
| UBCD                                                                | 317       | 2305                   | 1282      | 1719 | 1985 | 2725 | 4213 | 13183 |      |      |       |       |

**Note: (1):** The cell cluster names were extracted from the original publication.

**(2):** The gene counts only considered protein-coding genes, thus some numbers may be slightly different from the original publication.

**(3):** The number represents the number of detected genes of a corresponding cell cluster. Gene expression in a single cell was defined as >0 UMI/TPM count. Gene expression in a cell cluster was defined as having expression in at least 5 cells from a random sampling (with replacement) of 1000 cells. Then the presented number of genes indicates the average detected gene number through bootstrap sampling (with replacement) of 1000 cells for 100 times. Such a strategy allows an overall fair comparison of gene numbers across studies which have different total cell numbers.

**(4):** Same as determining the expressed gene number of a cell cluster in (3), but instead work with the mixture of all single cells from a tissue/sample type.

**Colormap:** The colormap represents the relative gene number abundance in each column across all cell clusters/samples.

**Gene number:** Because of random sampling and/or averaging, the gene numbers in this table were rounded to the nearest integer in case necessary.

**Table S3. Human gene names across gene clusters defined by germ cell expression pattern, Related to Figure 1 and 2.** The gene name lists correspond to the human gene clusters defined by germ cell expression pattern in Figure 2D-E.

**Table S4. Mouse gene names across gene clusters defined by germ cell expression pattern, Related to Figure S2 and STAR Methods.** The gene name lists correspond to the mouse gene clusters defined by germ cell expression pattern in Figure S2C-D.

**Table S5. Gene lists of bidirectional gene pairs and all upstream-confounded genes, Related to Figure 3 and STAR Methods.**

**Table S6. Human gene names across gene groups defined by germ cell expression levels, Related to Figure 5 and STAR Methods.** The gene name lists correspond to the gene groups defined by germ cell expression levels as shown in Figure 5B.

**Table S7. Gene Ontology (GO) terms analysis of the unexpressed genes (sheet 1) and highly-expressed genes (sheet 2) during human spermatogenesis, Related to Figure 7.** The GO term analysis was done by GOrilla (Eden et al., 2009). 'FDR q-value' is the corrected p-values for multiple testing using the Benjamini and Hochberg method (Benjamini and Hochberg). Enrichment (N, B, n, b) is defined as 'Enrichment =  $(b/n) / (B/N)$ '. N, total number of genes; B, total number of genes associated with a specific GO term; n, number of genes in the input list; b, number of genes in the intersection. The highlighted GO terms were displayed in Figure 7A.
